# Supplementary material
Source: MDPI journal article supplement (https://www.mdpi.com/1999-4907/15/1/42)
Supplement: s1 [file s1]

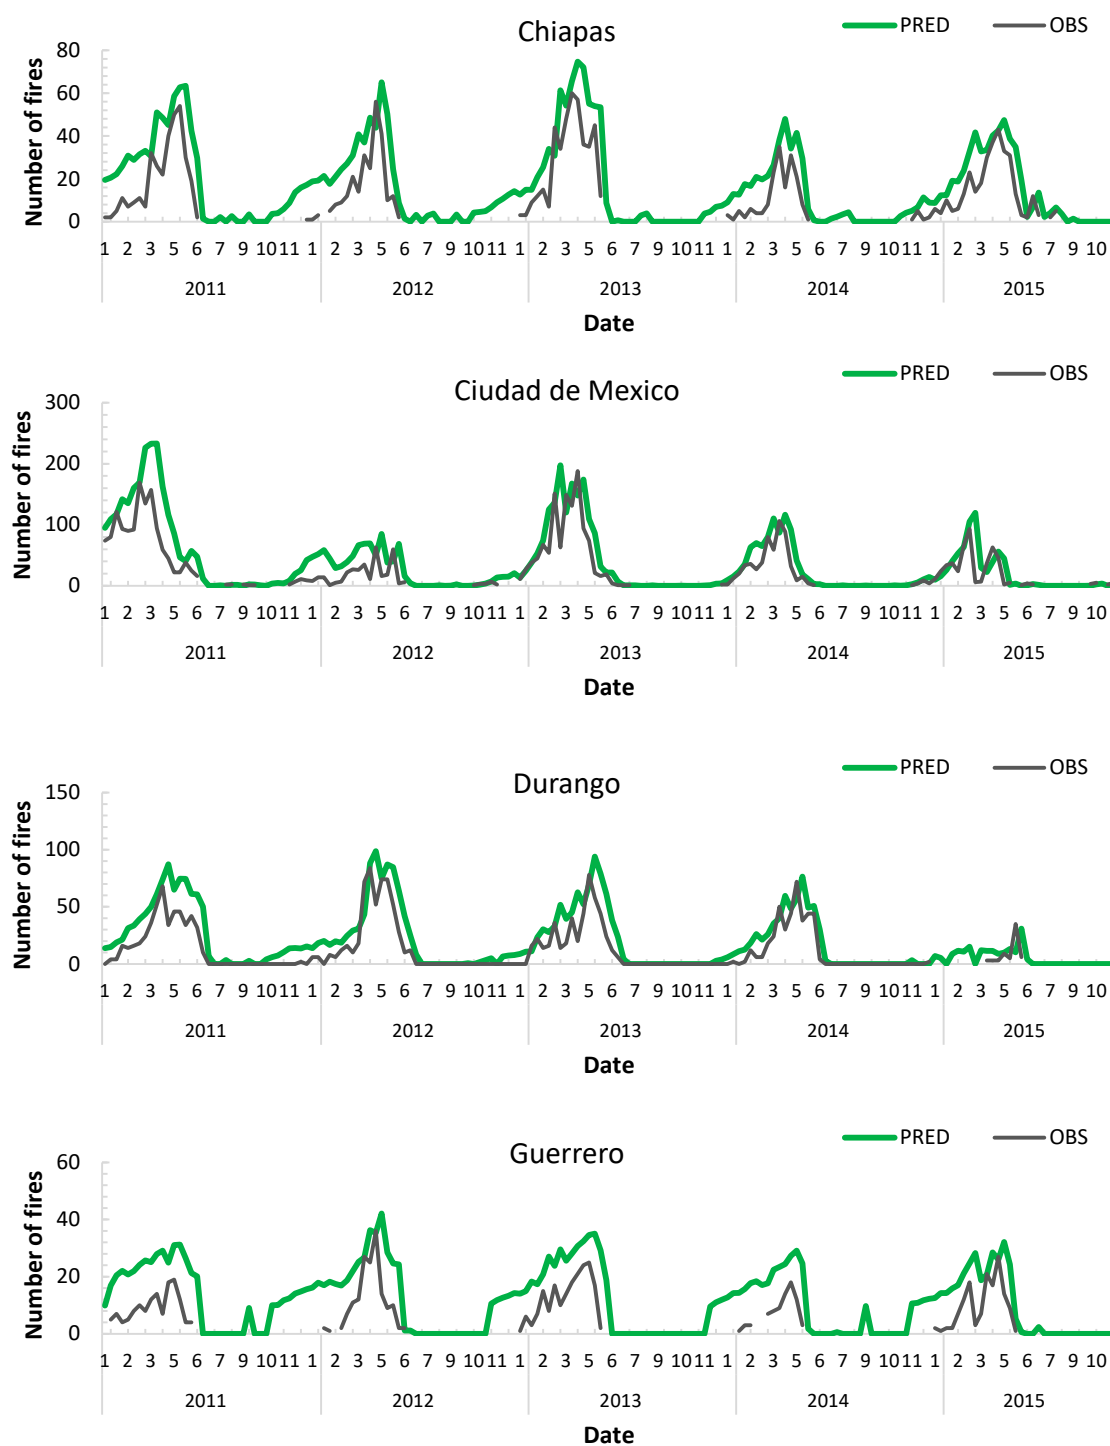

**Supplementary Figure S1.** Observed and predicted number of fires per dekade for the states of Chiapas, Ciudad de Mexico, Durango and Guerrero. Where: PRED: predicted with models from table 1; OBS: observed.

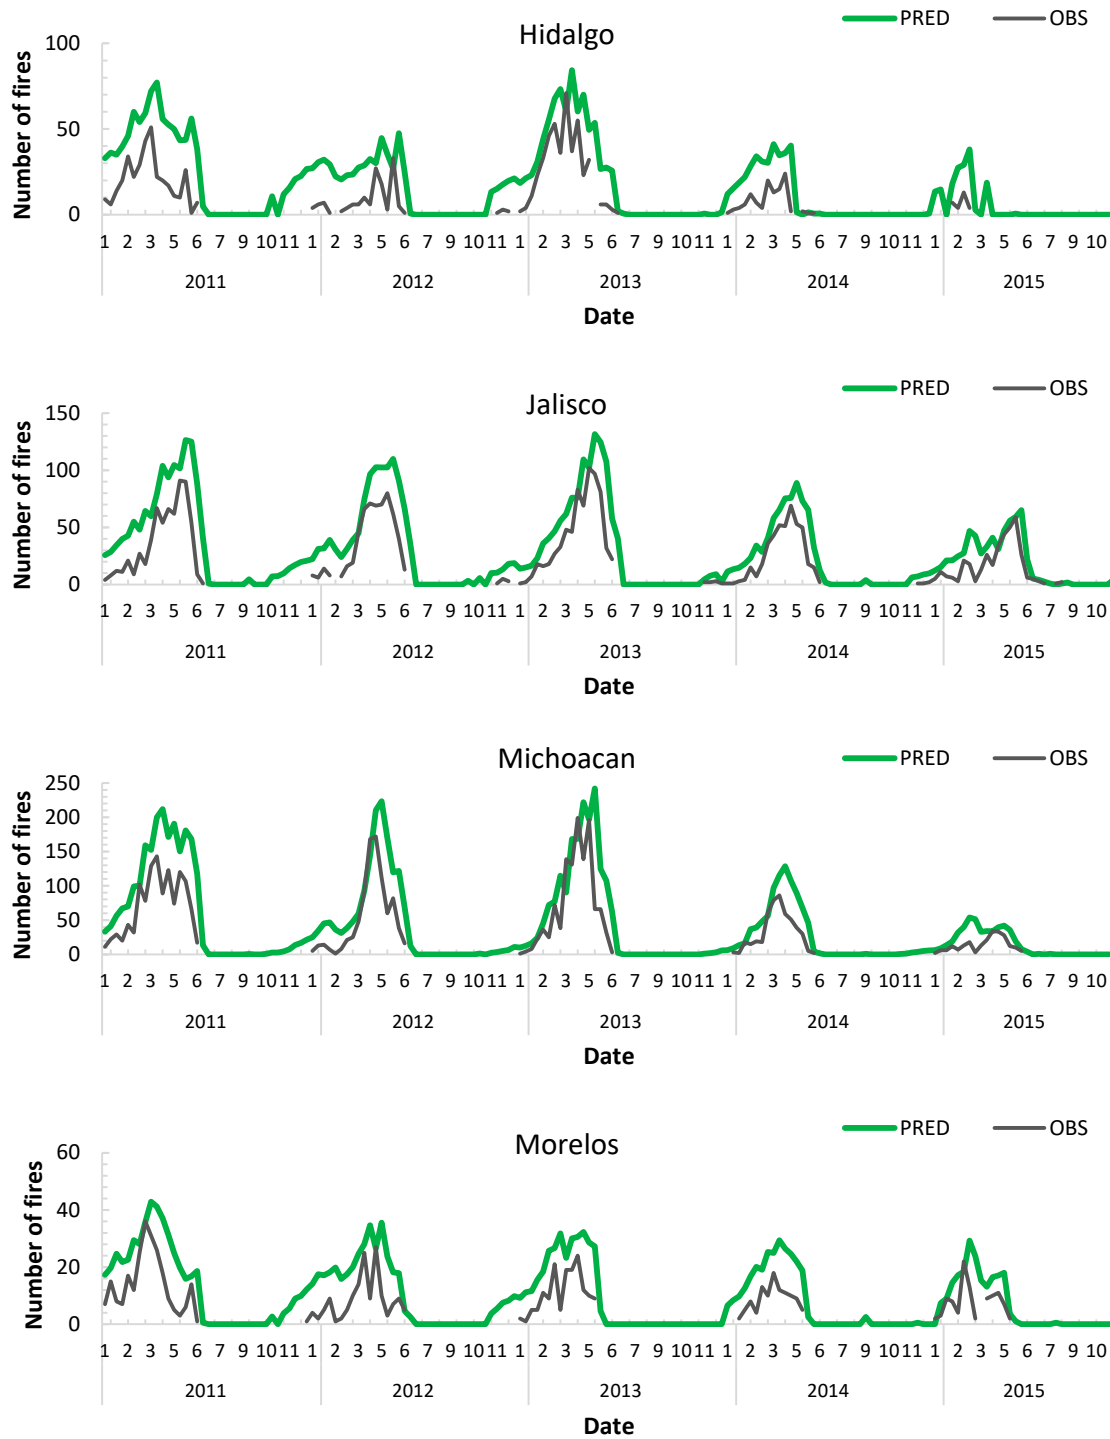

**Supplementary Figure S2.** Observed and predicted number of fires per dekad for the states of Hidalgo, Jalisco, Michoacan and Morelos. Where: PRED: predicted with models from table 1; OBS: observed.

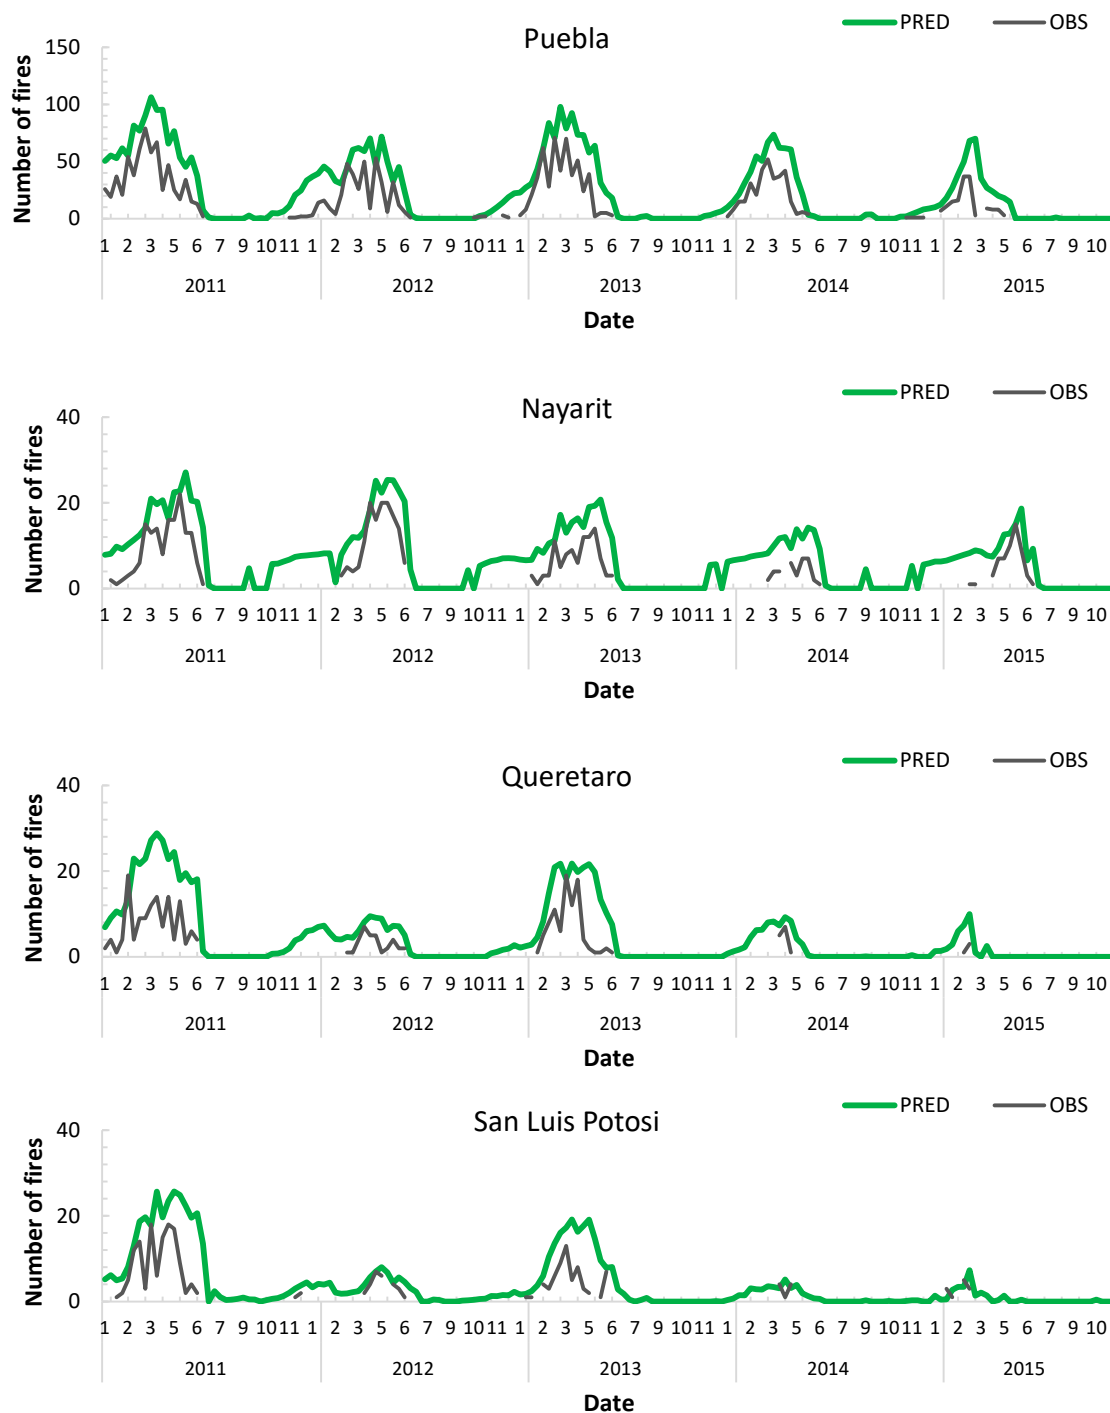

**Supplementary Figure S3.** Observed and predicted number of fires per dekade for the states of Puebla, Nayarit, Queretaro and San Luis Potosi. Where: PRED: predicted with models from table 1; OBS: observed.

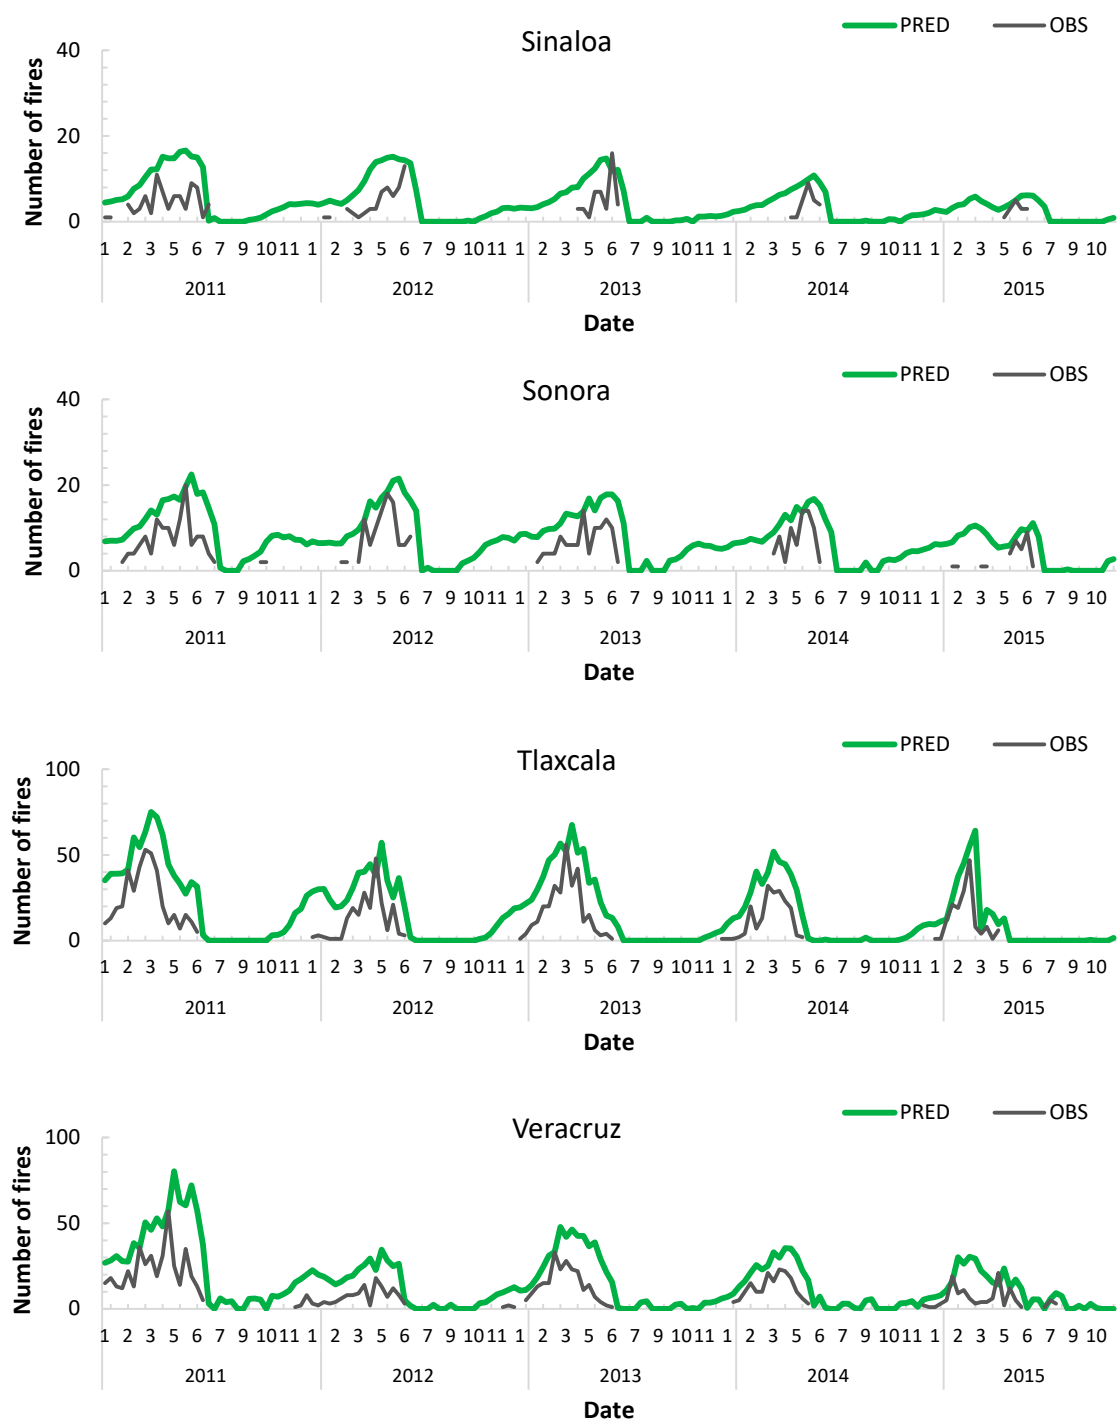

**Supplementary Figure S4.** Observed and predicted number of fires per decade for the states of Sinaloa, Sonora, Tlaxcala, and Veracruz. Where: PRED: predicted with models from table 1; OBS: observed.

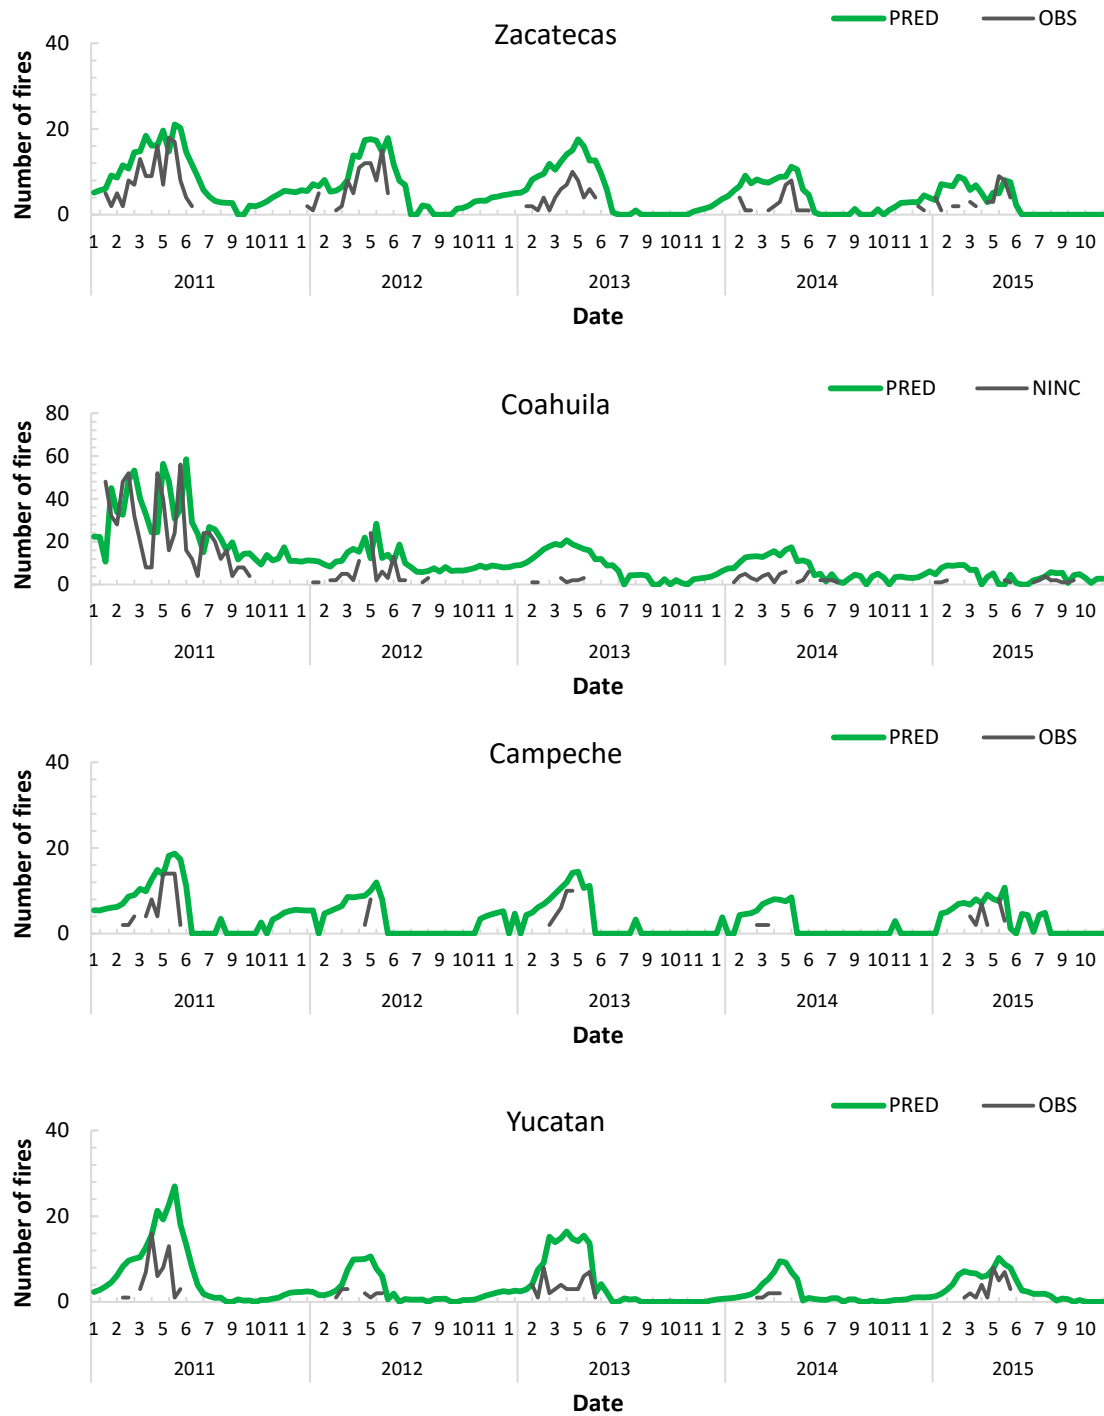

**Supplementary Figure S5.** Observed and predicted number of fires per decade for the states of Zacatecas, Coahuila, Campeche and Yucatan. Where: PRED: predicted with models from table 1; OBS: observed.

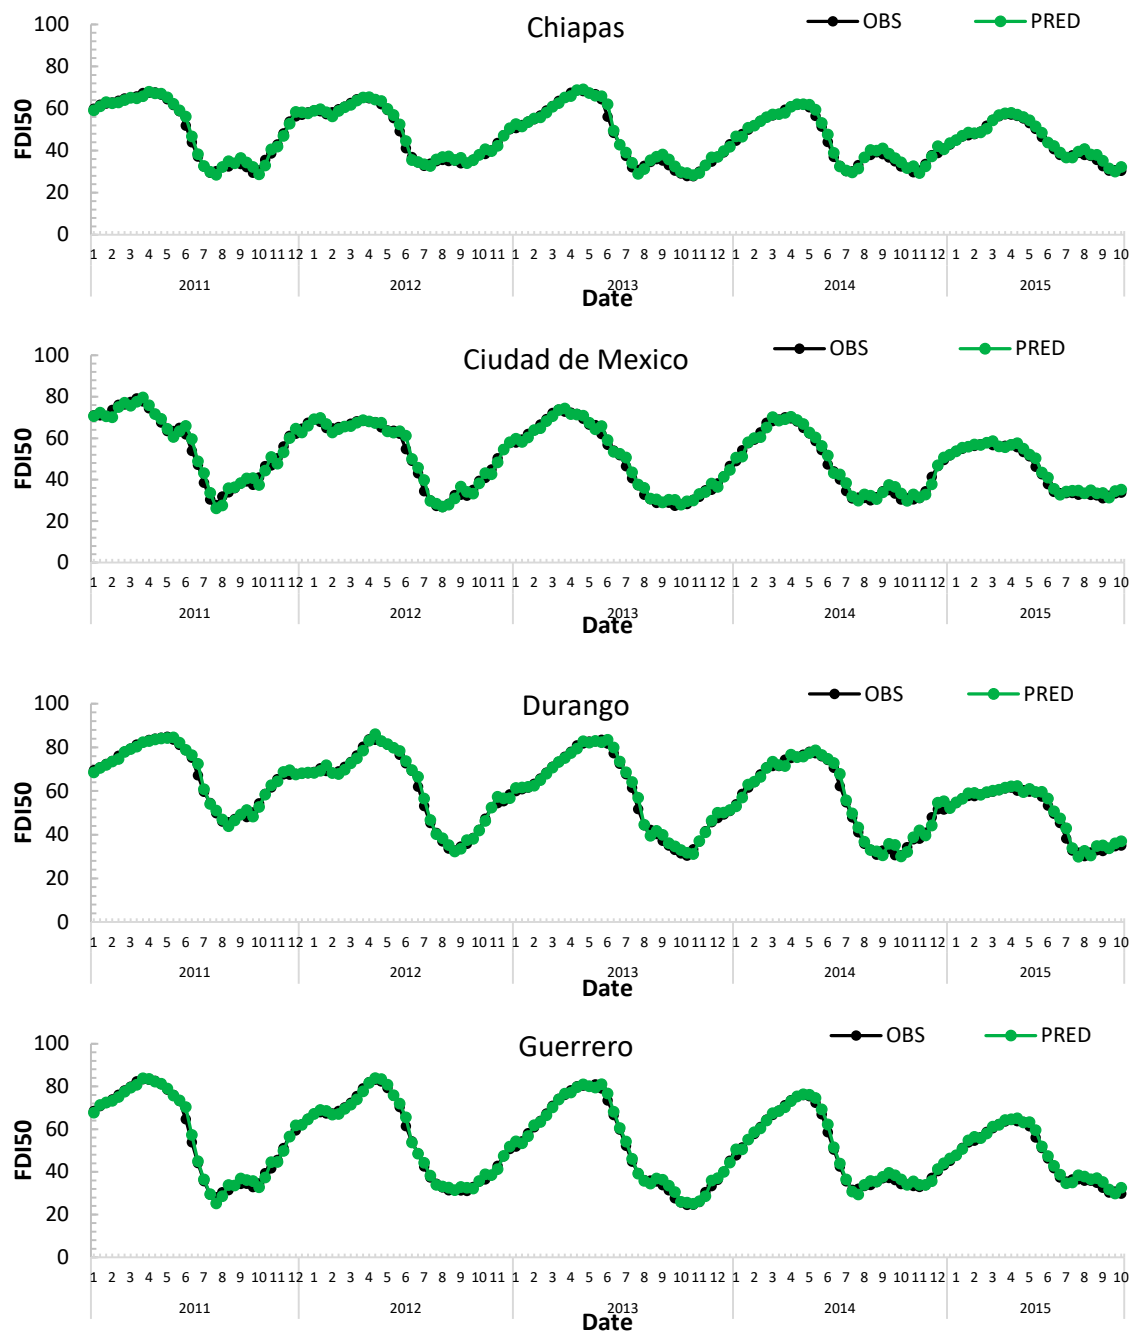

**Supplementary Figure S6.** Observed and predicted accumulated fuel dryness FDI50 for the states of Chiapas, Ciudad de Mexico, Durango and Guerrero. Where: PRED: predicted with models from table 2; OBS: observed.

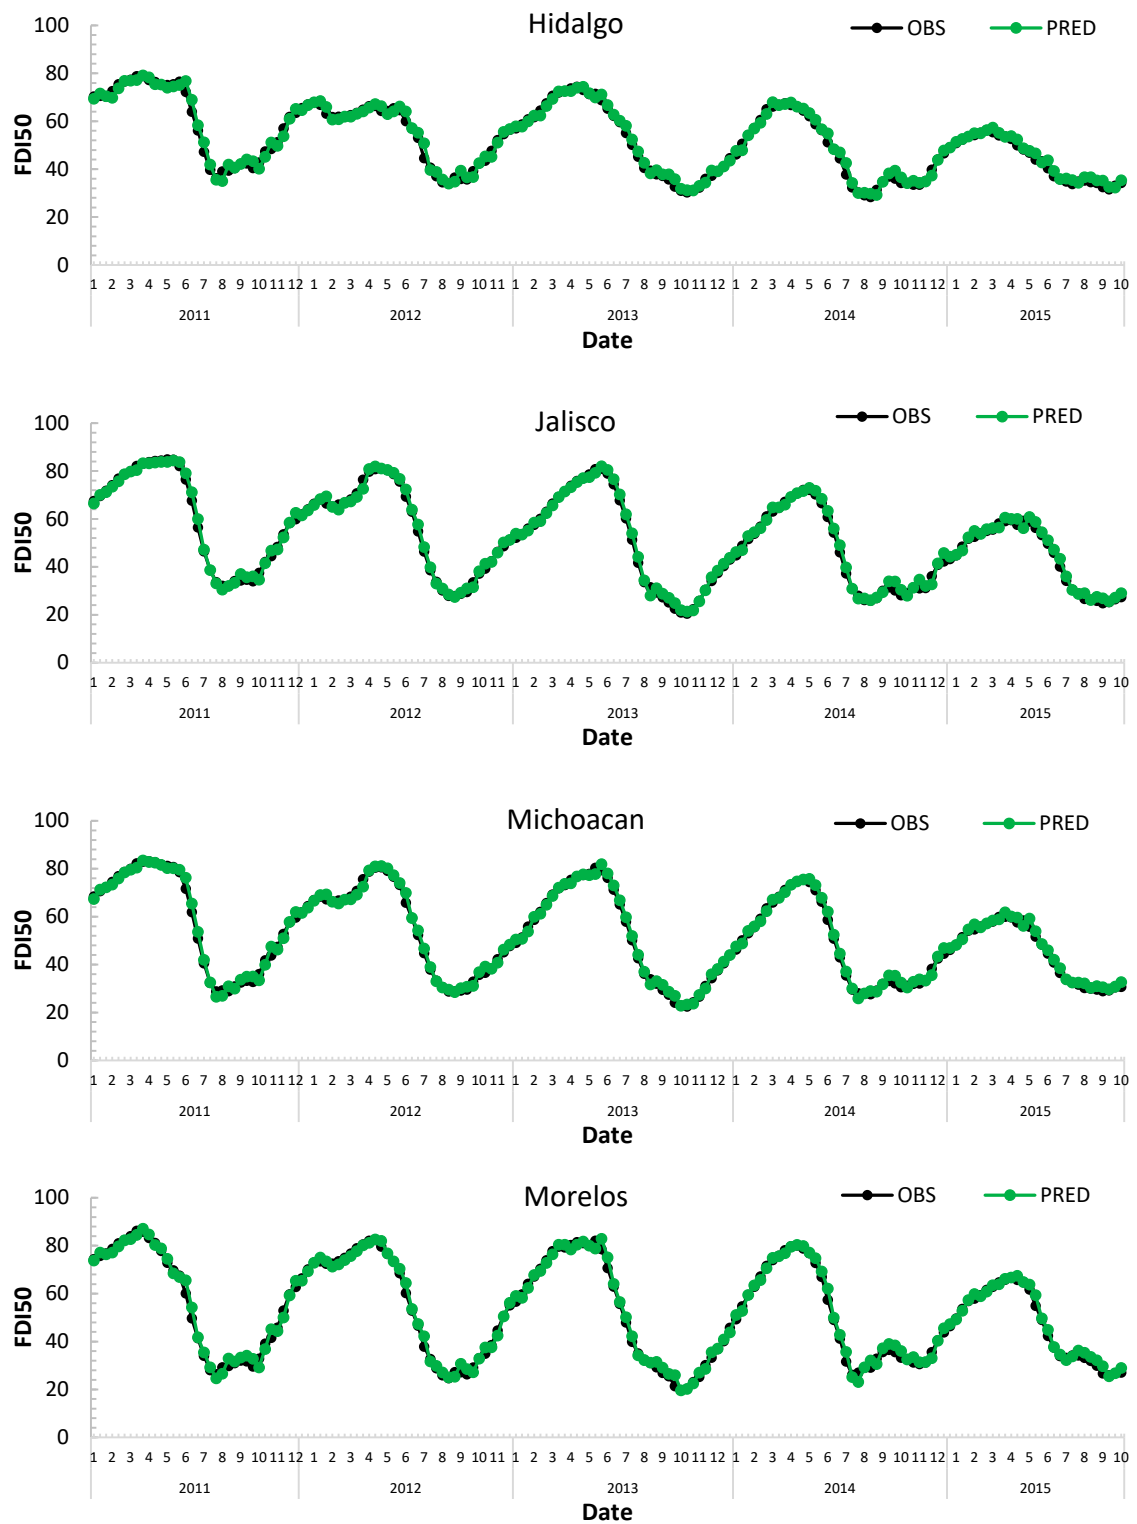

**Supplementary Figure S7.** Observed and predicted accumulated fuel dryness FDI50 for the states of Hidalgo, Jalisco, Michoacan and Morelos. Where: PRED: predicted with models from table 2; OBS: observed.

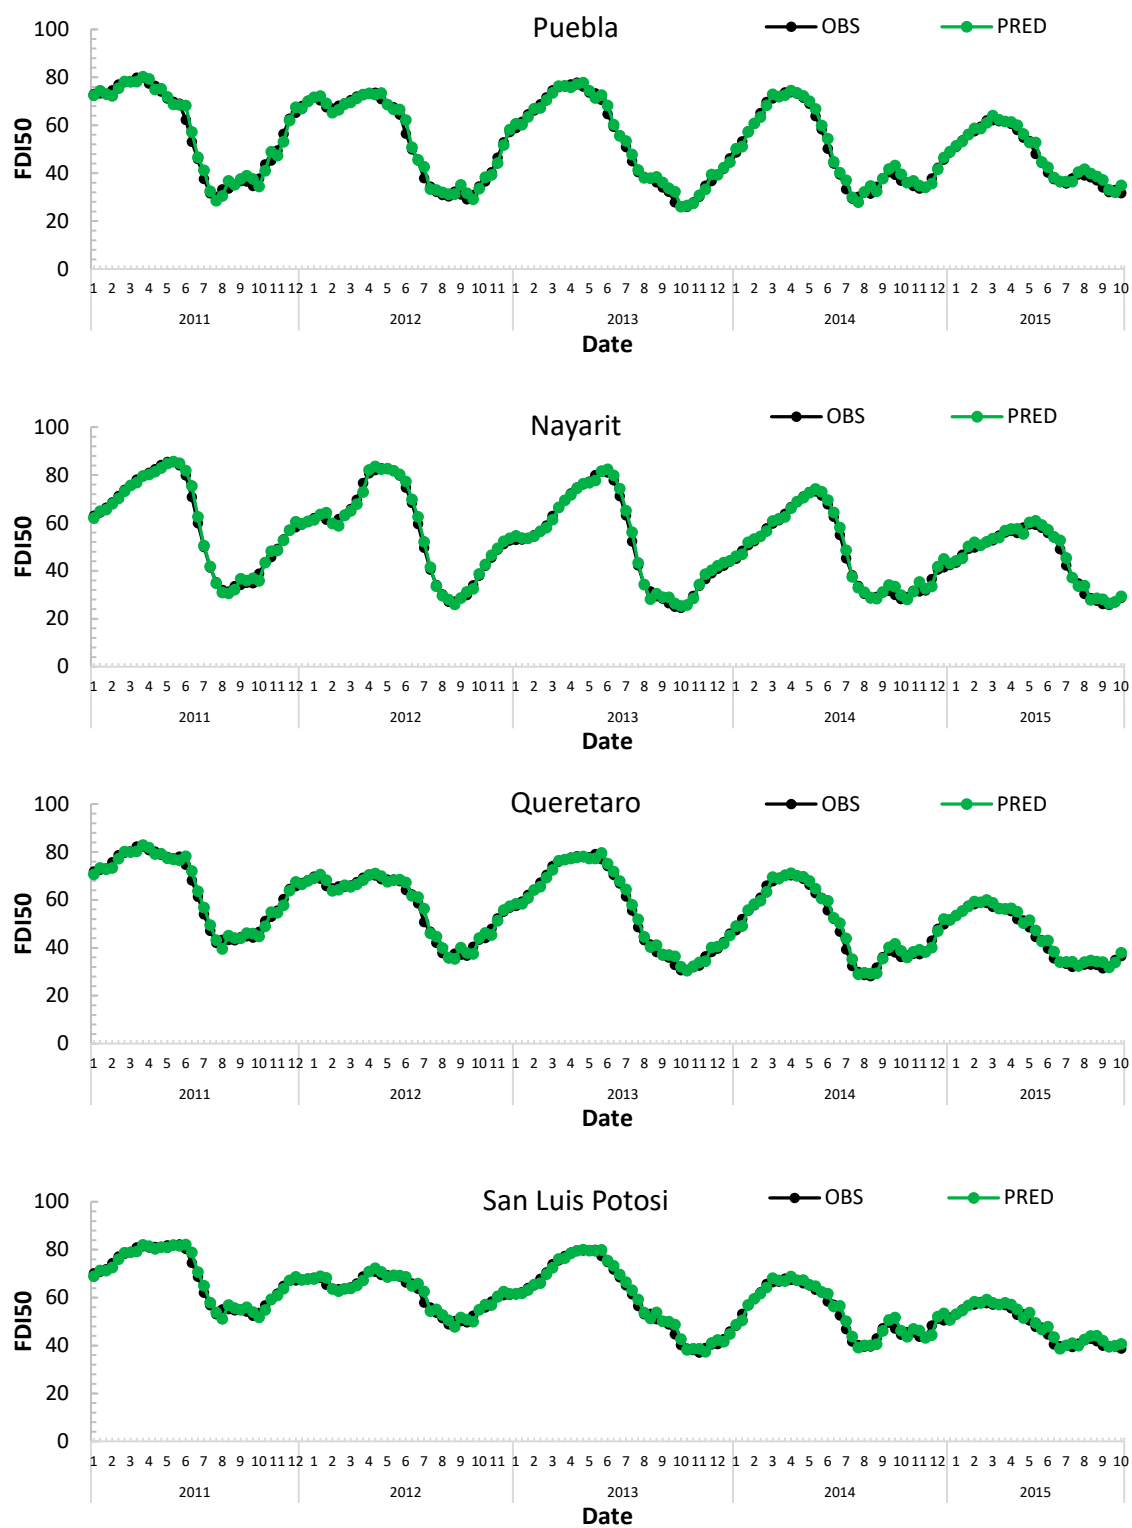

**Supplementary Figure S8.** Observed and predicted accumulated fuel dryness FDI50 for the states of Puebla, Nayarit, Queretaro and San Luis Potosi. Where: PRED: predicted with models from table 2; OBS: observed.



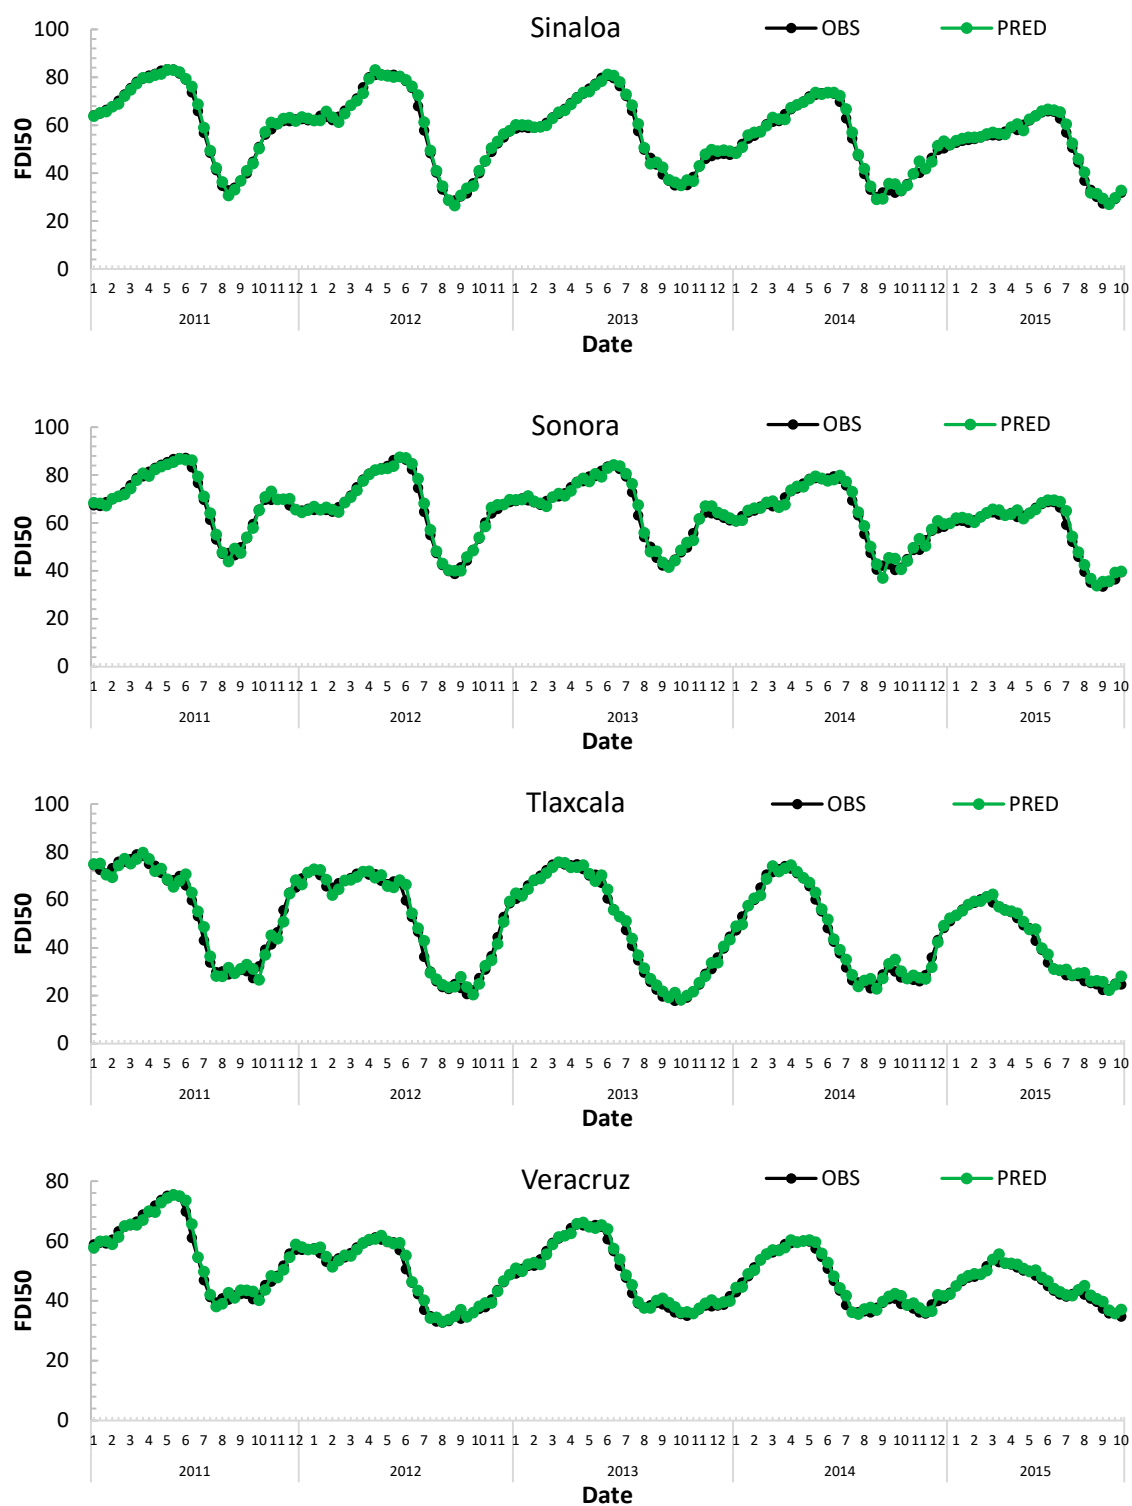

**Supplementary Figure S9.** Observed and predicted accumulated fuel dryness FDI50 for the states of Sinaloa, Sonora, Tlaxcala, and Veracruz. Where: PRED: predicted with models from table 2; OBS: observed.

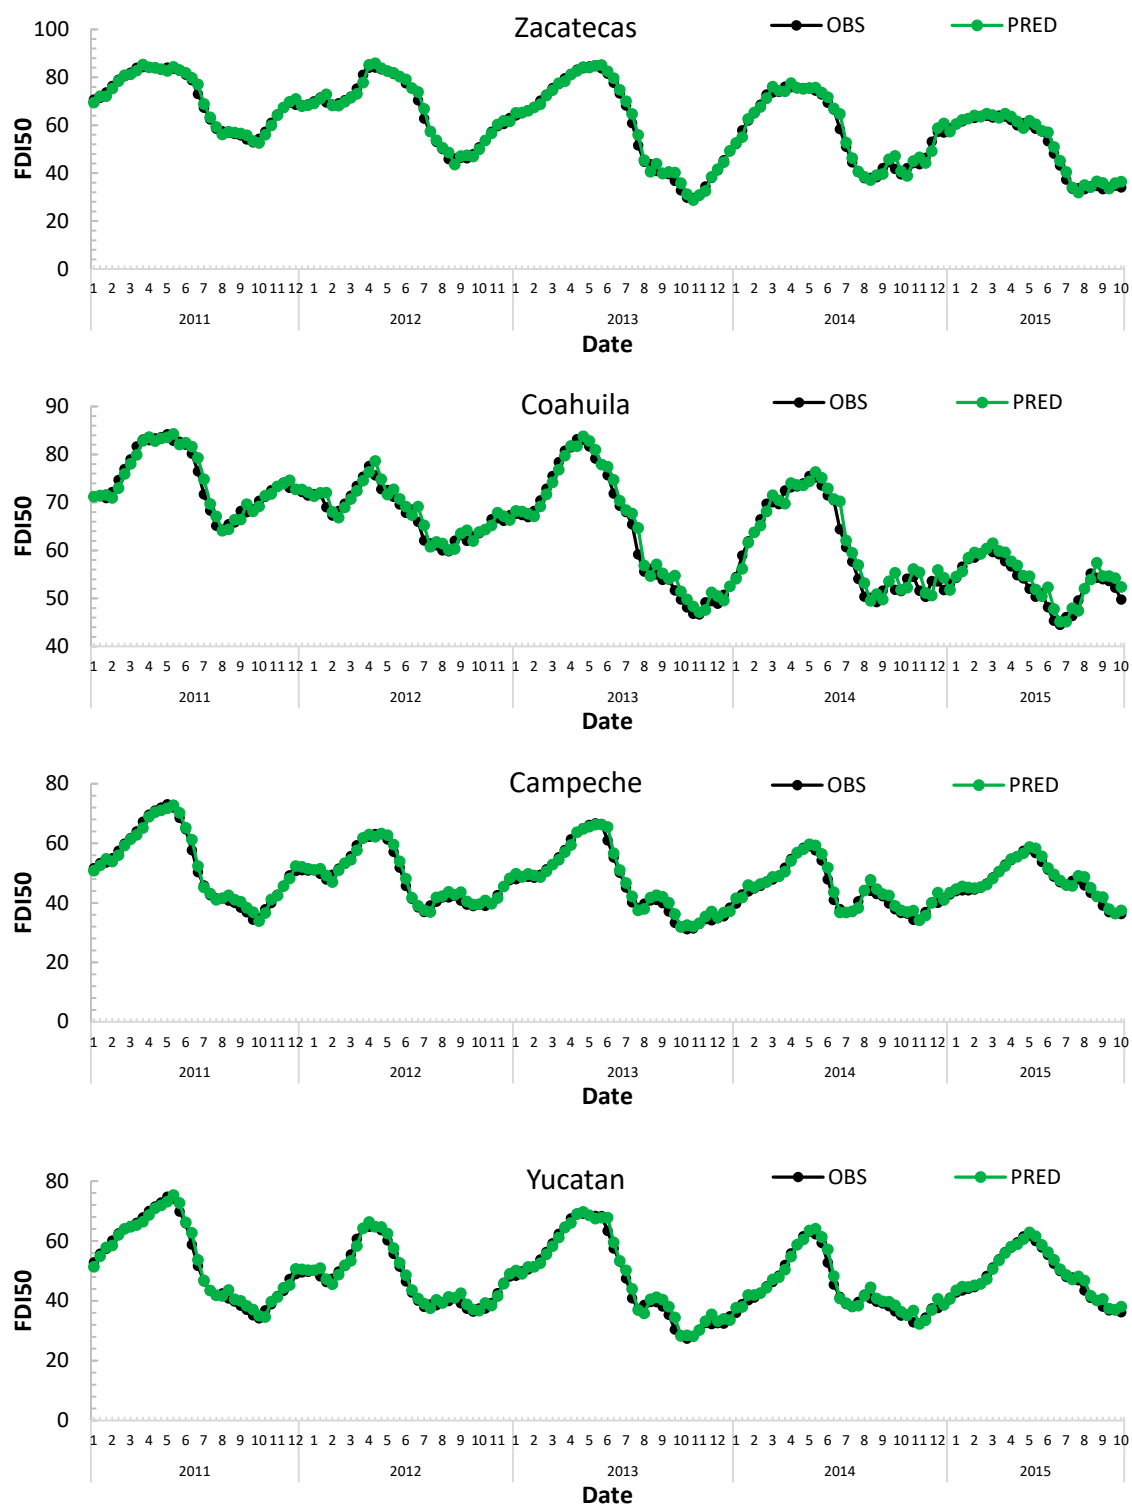

**Supplementary Figure S10.** Observed and predicted accumulated fuel dryness FDI50 for the states of Zacatecas, Coahuila, Campeche and Yucatan. Where: PRED: predicted with models from table 2; OBS: observed.
